# Supplementary material for: YVO4:Nd3+ nanophosphors as NIR-to-NIR thermal sensors in wide temperature range
Source: PubMed Central journal article supplement (PMC5740097; doi:10.1038/s41598-017-18295-w), 2017-12-21
Supplement: 41598_2017_18295_MOESM1_ESM.pdf [file 41598_2017_18295_MOESM1_ESM.pdf]

# **YVO<sub>4</sub>:Nd<sup>3+</sup> nanophosphors as NIR-to-NIR thermal sensors in wide temperature range**

I.E. Kolesnikov<sup>\*,1,2</sup>, A.A. Kalinichev<sup>1</sup>, M.A. Kurochkin<sup>1</sup>, E.V. Golyeva<sup>3,4</sup>, E.Yu. Kolesnikov<sup>5</sup>,  
A.V. Kurochkin<sup>1</sup>, E. Lähderanta<sup>2</sup>, M.D. Mikhailov<sup>4</sup>

<sup>1</sup> *St. Petersburg State University, 7/9 Universitetskaya nab., 199034, St. Petersburg, Russia*

<sup>2</sup> *Lappeenranta University of Technology LUT, Skinnarilankatu 34, 53850, Lappeenranta, Finland*

<sup>3</sup> *Peter the Great St. Petersburg Polytechnic University, St. Petersburg, Russia*

<sup>4</sup> *Scientific and Technological Institute of Optical Material Science, VNTs S. I. Vavilov State Optical Institute, Babushkina 36-1, 192171, St. Petersburg, Russia*

<sup>5</sup> *Volga State University of Technology, Lenin sqr. 3, 424000, Yoshkar-Ola, Russia*

One of the most important parameter for characterizing luminescent thermometers is the relative thermal sensitivity, which is defined as follows [S. A. Wade, S. F. Collins and G. W. Baxter, *J. Appl. Phys.*, 2003, **94**, 4743–4756]:

$$S = \frac{1}{\Lambda} \frac{\Delta\Lambda}{\Delta T}$$

where  $\Lambda$  is the temperature dependent parameter (LIR, line shift or FWHM) taken into account and  $\Delta\Lambda$  expresses the change in this parameter with change of temperature,  $\Delta T$  [Ł. Marciniak, A. Bednarkiewicz, D. Hreniak and W. Strek, *J. Mater. Chem. C*, 2016, **4**, 11284–11290].

The relative thermal sensitivity of all temperature dependent parameters was obtained at  $T=303$  K (or at  $T=298$  K in case of FWHM).

Here, we present the relative thermal sensitivity calculation based on LIR, line shift and FWHM for  $\text{YVO}_4:\text{Nd}^{3+}$  2.4 at.% NPs. Similar calculations have been also carried out for 0.6 and 4.8 at.%-doped samples.

### LIR

$$S_{LIR} = \frac{1}{LIR_{303K}} \cdot \frac{|LIR_{323K} - LIR_{303K}|}{323 - 303} = \frac{1}{2.504} \cdot \frac{|2.236 - 2.504|}{323 - 303} = 0.0054 \text{ K}^{-1} = 0.54 \%K^{-1}$$

### Line shift

$$S_{\delta\nu} = \frac{1}{\delta\nu_{303K}} \cdot \frac{|\nu_{323K} - \nu_{303K}|}{323 - 303}$$

$$\delta\nu_{303K} = \nu_{0K} - \nu_{303K}$$

$\nu_{0K}$  was calculated using parameters obtained from exponential fitting:

$$\nu_{0K} = 9445.8 - 39.6 = 9406.2 \text{ cm}^{-1}$$

$$\delta\nu_{303K} = \nu_{0K} - \nu_{303K} = 9406.2 - 9399.5 = 6.7 \text{ cm}^{-1}$$

So, the relative thermal sensitivity:

$$S_{\delta\nu} = \frac{1}{\delta\nu_{303K}} \cdot \frac{|\nu_{323K} - \nu_{303K}|}{323 - 303} = \frac{1}{6.7} \cdot \frac{|9398.5 - 9399.5|}{323 - 303} = 0.0075 \text{ K}^{-1} = 0.75 \%K^{-1}$$

### FWHM

$$S_{\Delta\nu} = \frac{1}{\Delta\nu_{298K}} \cdot \frac{|\Delta\nu_{323K} - \Delta\nu_{298K}|}{323 - 298} = \frac{1}{43.271} \cdot \frac{|44.84 - 43.271|}{323 - 298} = 0.0014 \text{ K}^{-1} = 0.14 \%K^{-1}$$
